# Supplementary material for: Biogeographic classification of the Caspian Sea
Source: Copernicus journal article supplement (doi:10.5194/bg-11-6451-2014), 2014-11-27
Supplement: Supplementary file 1 [file bg-11-6451-2014-supplement.pdf]

Supplement of Biogeosciences, 11, 6451–6470, 2014  
<http://www.biogeosciences.net/11/6451/2014/>  
doi:10.5194/bg-11-6451-2014-supplement  
© Author(s) 2014. CC Attribution 3.0 License.

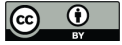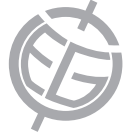

*Supplement of*

## **Biogeographic classification of the Caspian Sea**

**F. Fendereski et al.**

*Correspondence to:* F. Fendereski (fendereski\_f@yahoo.com)

# Supplement: Bio-geographic classification of the Caspian Sea

## S1. Selection of input variables

Variables were sorted into groups of dependent variables (using Euclidean distance metric and average linkage criterion) and represented in a dendrogram, where the vertical axis represents the degree of similarity ( $\sigma$ ) between variables based on their correlation coefficient (Table S1). The 'y' axis values ( $\sigma$ ) of the dendrogram were calculated as below:

$$\sigma(i, j) = 1 - C(i, j)$$

where  $i$  and  $j$  are the variables grouped in the lowest branches of the dendrogram,  $C(i, j)$  is the correlation coefficient between them and  $\sigma(i, j)$  is the correspondent ' $\sigma$ ' value for each two connecting variables.

For higher hierarchies,  $\sigma$  is obtained as follow:

$$\sigma(i, j, h) = ((1 - C(i, h)) + (1 - C(j, h))) / 2$$

Where  $i$  and  $j$  are the two variables from the first cluster, and  $h$  is a new variable that can be added to this set at a higher level.

## S2. Number of neurons

In order to define the optimal number of neurons, a series of SOM training runs were performed with different number of neurons. The corresponding quality of each SOM experiment (goodness of the map) was assessed on the basis of average quantization and

topological errors (Uriarte and Martin, 2005). Quantization error (QE) is the average distance between each observation vector and its best matching unit (BMU) on neuron map while topological error (TE) measures topology preservation of the SOM (Kohonen, 2000). Increasing the number of neurons decreased the quantization error and increased the topological error (Uriarte and Martin, 2005). Total error was calculated by summing up normalized quantization and topological errors (Table S2). A 20×20 map size provided the lowest number of neurons after which increase in the number of neurons would not lead to a significant decrease in total error anymore (Fig. S1). Hence, we chose a 20×20 neuron map as our standard map.

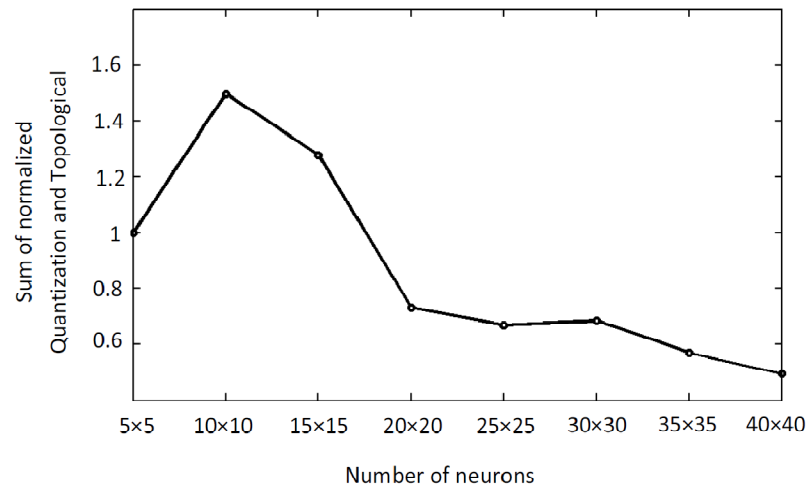

Fig. S1

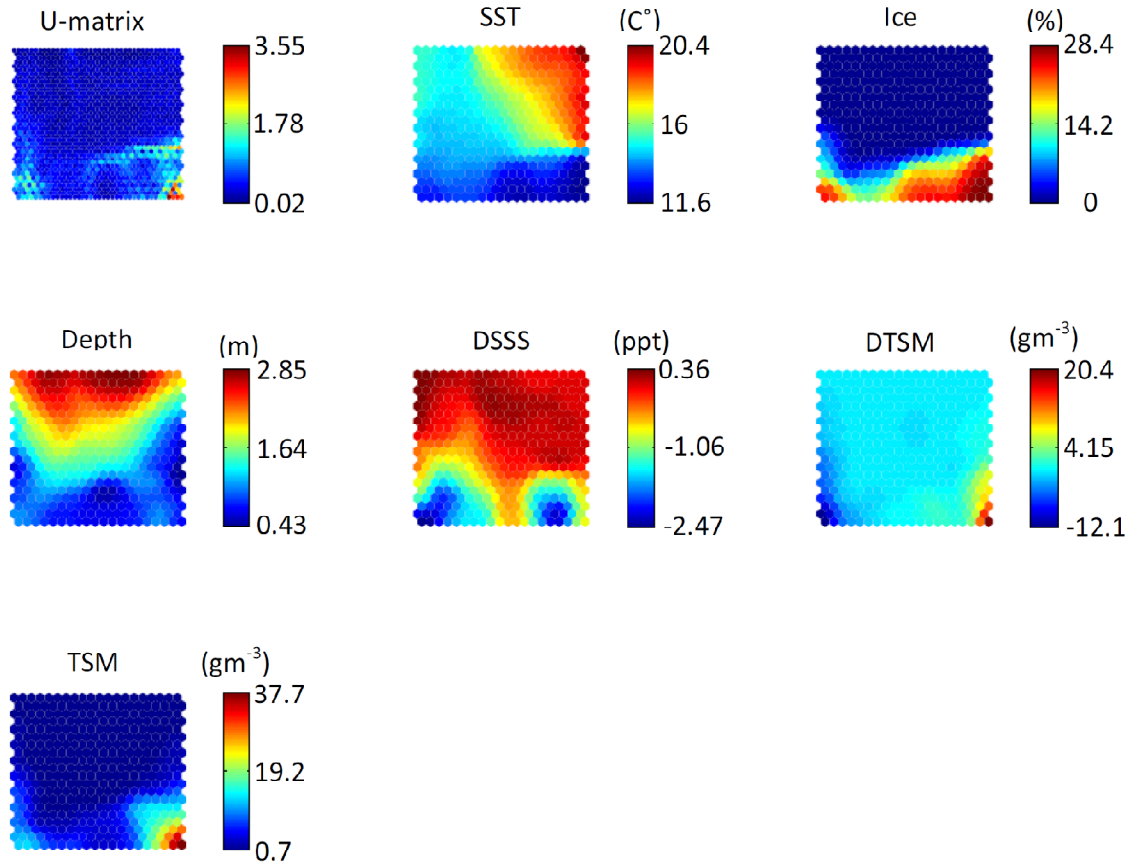

Fig. S2

### S3. Number of ecoregions

A 10-fold cross validation approach was conducted to determine the optimum of number of classes (De' ath and Fabricius, 2000). The data on six input variables (Sect. 2.2.2) were divided into two unequal parts of 90% (the training set) and 10% (the validation set). To this aim, a matrix of 120x98 (similar to the input variables matrices; see Sect. 2.2.1) containing values from 1 to 10 was created. Each value made 10% of the matrix and was distributed evenly throughout the matrix. For validation set selection for each iteration ( $k=1:10$ ), pixels in the newly created matrix that were equal to 'k' were selected and corresponding indices in the input variables matrices were extracted. The remaining indices were used for training the SOM. The training data set was reduced to 400 classes ( $20 \times 20$  neurons) using SOM. These 400 prototypes were further agglomerated using the HAC algorithm. The clustering of the validation data set was performed using the following procedure:

- 1) Each observation from the validation set was compared to the 400 neurons.

- 2) The closest neuron on the map (using the Euclidean distance), also called best matching unit (BMU), was identified.
- 3) The class of the BMU was attributed to the observation.

For each cross validation experiment ( $k=1, \dots, 10$ ) for each number of class ( $n=2, \dots, 15$ ), the optimal classification was the one that minimizes the average distance of the validation observations to the center (average) of their respective classes ( $E_{kn}$ ):

$$E_{kn(k=1:10 \ \& \ n=2:15)} = \frac{1}{6} \sum_{j=1}^6 \left( \frac{1}{v} \sum_{N=1}^v |v_{ijkn} - t_{ijkn}| \right) \quad (1)$$

where  $v_{ijkn}$  is the validation observation associated with variable  $j$  and cross validation experiment  $k$  for the experiment for  $n$  number of classes,  $t_{ijkn}$  the average of the corresponding class in training data set assuming a number of class  $i$  ( $i=1:n$ ) and where  $v$  is the number of points in the validation set.

Data were normalized in advance to solve the problem of the inconsistency of the variables units. The final cross validation error for the given number of class ( $E_n$ ; where  $n=2:15$ ) was computed based on the errors for all the 10 given cross validation folds (Table S3):

$$E_n = \frac{1}{10} \sum_{k=1}^{10} E_{kn} \quad (2)$$

Fig. S3 shows the amount of final cross validation error plotted against the number of classes. The error decreased monotonically with increasing the number of classes. Hence, the lowest number of classes after which the increase in the number of classes no longer led to a substantial reduction in the error was considered as the optimal number of class in this study. This gained saturated at a number of 11 classes, and we chose the point where less than 5% of the first decrease was gained by the addition of further classes as our cut-off.

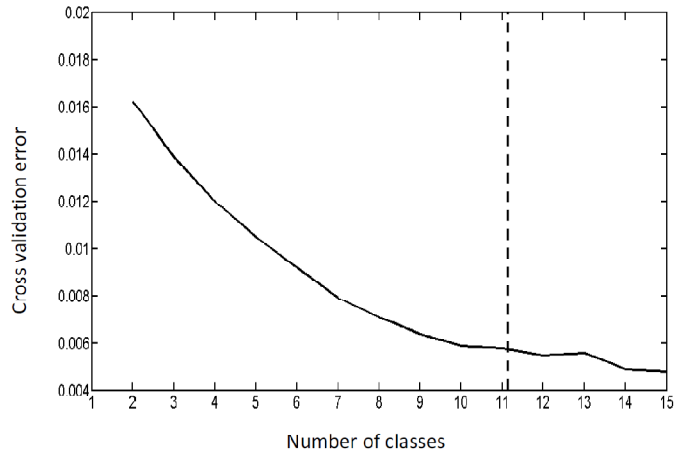

Fig. S3

#### S4. Species composition data

The Dice coefficient (*DC*) is defined as two times the volume of overlap between two sets belonging to different groups (A and B) divided by the sum of volumes of the two groups, given by

$$DC = \frac{2|A \cap B|}{|A| + |B|}$$

#### S5. (Dis) Similarity between ecoregions

In order to establish the degree of dissimilarity of the resulting clusters, we employed the annual mean climatologies of the physical input variables and visualized the relationships between the six-dimensional observational points within/between ecoregions using the Non-metric Multidimensional Scaling (NMDS) method (Clarke, 1993). NMDS is a data reduction technique that projects n-dimensional data onto a space of lower dimensionality based on a distance matrix between data points (Quinn and Keough, 2002). We performed NMDS on a similarity matrix obtained using pair-wise Euclidean distances between 11760 observations of the six standardized input variables (SST, DSSS, Depth, TSM, DTSM and ICE; Reich et al., 1999; Quinn and Keough, 2002).

The Non-metric Multidimensional Scaling of the environmental conditions in the different ecoregions reveals that the 10 ecoregions tend to group into two clusters: one cluster groups the ecoregions of the NCB (Fig. S5; NCB-UF, NCB-WS, NCB-ES and NCB-RO, red circle) while the other groups those of the MCB and SCB (Fig. S5; MCB-OS, SCB-OS, MDB-C and

SCB-C, green circle). The two sub-clusters are separated by NCB-T and MCB-T, which act as a “transition zone”. Points in MCB-T (red circles) are more similar to the group from the MCB and SCB and those of NCB-T (pink circles) are more similar to the group from the NCB. NCB-ES was most different from the other ecoregions in terms of environmental conditions (Fig. S5; light orange circles, upper right). The larger spread between points in ecoregions in the NCB suggested a smaller degree of bio-geophysical homogeneity within the NCB. In the SCB and MCB, SCB-OS (dark blue circles) and MCB-OS (light blue circles) were more similar to one another than the other ecoregions in this area (Fig. S5; lower points on the left). The degree of similarity was reflected in the hierarchical sequence in which ecoregions were formed (Fig. 4 and Fig. S4).

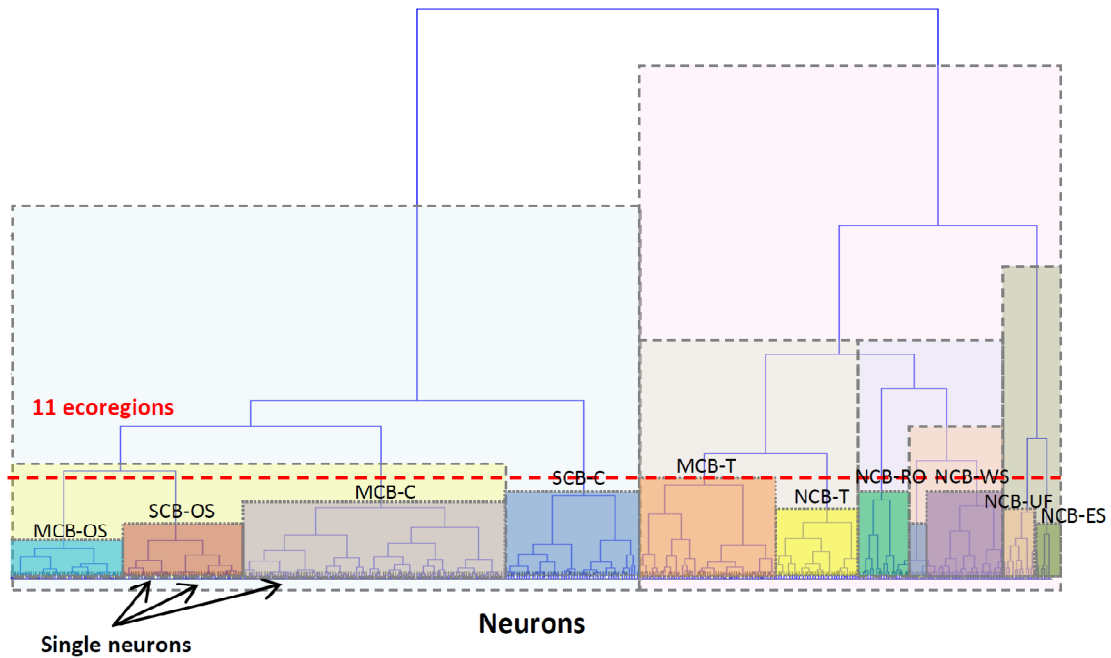

Fig. S4

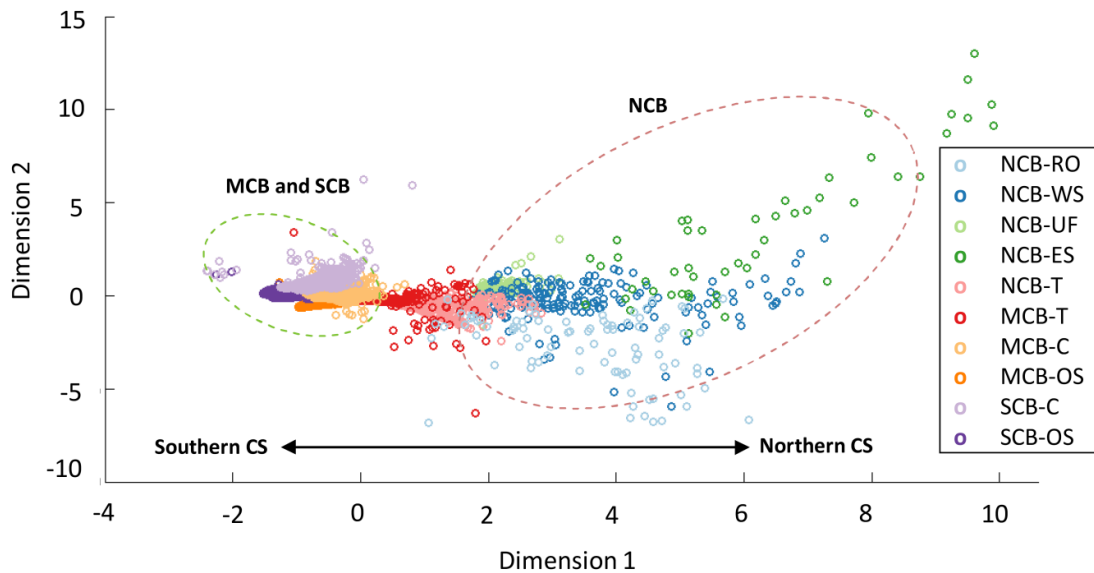

Fig. S5

## References

- Clarke, K. R.: Non-parametric multivariate analyses of changes in community structure, *AUST J ECOL.*, 18, 117–143, doi: 10.1111/j.1442-9993.1993.tb00438.x, 1993.
- De'ath, G. and Fabricius, K. E.: Classification and regression trees: A powerful yet simple technique for ecological data analysis, *ECOLOGY*, 81, 3178–3192, doi: 10.1890/0012-9658(2000)081[3178:CARTAP]2.0.CO;2, 2000.
- Frades, I. and Matthiesen, R.: Overview on Techniques in Cluster Analysis, in: *Bioinformatics Methods in Clinical Research, Methods in Molecular Biology*, Matthiesen, R. (Ed.), Humana Press, New York, USA, doi: 10.1007/978-1-60327-194-3 5, 2010.
- Kohonen, T. (Ed.): *Self-Organizing Maps*, Springer-Verlag, Berlin Heidelberg, 3rd edn., 2000.
- Quinn, G. P. and Keough, M. J. (Eds.): *Experimental Design and Data Analysis for Biologists*, Cambridge University Press, New York, 2002.
- Reich, P. B., Ellsworth, D. S., Walters, M. B., Vose, J. M., Gresham, C., Volin, J. C., and Bowman, W. D.: Generality of leaf trait relationships: a test across six biomes, *ECOLOGY*, 80, 1955–1969, 1999.
- Uriarte, E. A. and Martin, F. D.: Topology preservation in SOM, *International Journal of Mathematical and Computer Sciences*, 1, 19-22, 2005.



## Supplementary Tables

Table S1. Spearman correlation matrix between input variables

|       | SST   | SSS   | TSM   | PAR   | Depth | ICE   | WSP3  | DSST  | DSSS  | DTSM  | DPAR | DWSP3 |
|-------|-------|-------|-------|-------|-------|-------|-------|-------|-------|-------|------|-------|
| SST   | 1     |       |       |       |       |       |       |       |       |       |      |       |
| SSS   | 0.83  | 1     |       |       |       |       |       |       |       |       |      |       |
| TSM   | -0.35 | -0.54 | 1     |       |       |       |       |       |       |       |      |       |
| PAR   | 0.92  | 0.93  | -0.43 | 1     |       |       |       |       |       |       |      |       |
| Depth | 0.53  | 0.46  | -0.65 | 0.5   | 1     |       |       |       |       |       |      |       |
| ICE   | -0.76 | -0.78 | 0.74  | -0.77 | -0.68 | 1     |       |       |       |       |      |       |
| WSP3  | -0.91 | -0.73 | 0.32  | -0.85 | -0.5  | 0.68  | 1     |       |       |       |      |       |
| DSST  | -0.78 | -0.86 | 0.63  | -0.85 | -0.62 | 0.77  | 0.69  | 1     |       |       |      |       |
| DSSS  | 0.64  | 0.57  | -0.34 | 0.61  | 0.5   | -0.71 | -0.53 | -0.58 | 1     |       |      |       |
| DTSM  | 0.25  | 0.27  | 0.07  | 0.26  | -0.06 | -0.03 | -0.27 | 0     | -0.07 | 1     |      |       |
| DPAR  | -0.85 | -0.68 | 0.16  | -0.81 | -0.32 | 0.6   | 0.9   | 0.59  | -0.43 | -0.27 | 1    |       |
| DWSP3 | 0.9   | 0.7   | -0.2  | 0.84  | 0.42  | -0.66 | -0.92 | -0.56 | 0.56  | 0.29  | -0.9 | 1     |

Table S2. Quantization and topological errors with different number of neurons

| Number of neurons | Quantization error | Topological error | Total error |
|-------------------|--------------------|-------------------|-------------|
| 5×5               | 0.94               | 0.06              | 1           |
| 10×10             | 0.55               | 0.15              | 1.5         |
| 15×15             | 0.41               | 0.14              | 1.28        |
| 20×20             | 0.3                | 0.11              | 0.73        |
| 25×25             | 0.25               | 0.11              | 0.67        |
| 30×30             | 0.21               | 0.11              | 0.68        |
| 35×35             | 0.19               | 0.11              | 0.6         |
| 40×40             | 0.16               | 0.1               | 0.49        |

Table S3. Final cross validation mean error for different number of classes ( $E_n; \times 10^{-3}$ ). The error was determined using mean absolute error (MAE) metric between each validation observation and its BMU.

| number<br>of<br>classes | 2  | 3  | 4  | 5  | 6 | 7 | 8 | 9 | 10 | 11 | 12  | 13 | 14  | 15  |
|-------------------------|----|----|----|----|---|---|---|---|----|----|-----|----|-----|-----|
| error                   | 16 | 14 | 12 | 11 | 9 | 8 | 7 | 7 | 6  | 6  | 5.9 | 6  | 5.5 | 5.4 |

Table S4. Mean  $\pm$  std for annual mean of each physical input variable in each ecoregion. Higher std is seen for Depth in the MCB and SCB while for TSM and its seasonal amplitude (DTSM) higher std is seen in NCB and shallow continental shelf of SCB (SCB-C).

| Ecoregion     | SST (C°)         | DSSS (ppt)       | Depth (m)           | TSM (g/m <sup>3</sup> ) | DTSM (g/m <sup>3</sup> ) | ICE (%)          |
|---------------|------------------|------------------|---------------------|-------------------------|--------------------------|------------------|
| <b>NCB-RO</b> | 13.16 $\pm$ 1.92 | -2.21 $\pm$ 0.78 | 13.63 $\pm$ 5.46    | 12.49 $\pm$ 3.51        | -8.4 $\pm$ 5.43          | 21.43 $\pm$ 5.32 |
| <b>NCB-WS</b> | 12.63 $\pm$ 0.67 | -1.8 $\pm$ 0.65  | 9.25 $\pm$ 4.9      | 12.89 $\pm$ 5.74        | 0.2 $\pm$ 4.06           | 20.99 $\pm$ 5.13 |
| <b>NCB-UF</b> | 12.1 $\pm$ 0.28  | -0.52 $\pm$ 0.23 | 4.83 $\pm$ 1.38     | 3.85 $\pm$ 2.5          | 0.37 $\pm$ 1.78          | 22.6 $\pm$ 3     |
| <b>NCB-ES</b> | 11.68 $\pm$ 0.69 | -0.72 $\pm$ 0.21 | 9.16 $\pm$ 6.81     | 29.61 $\pm$ 11.35       | 10.17 $\pm$ 10.97        | 28.33 $\pm$ 1.84 |
| <b>NCB-T</b>  | 13.58 $\pm$ 0.5  | -1.61 $\pm$ 0.38 | 8.81 $\pm$ 4.57     | 3.27 $\pm$ 2.56         | -1.4 $\pm$ 1.32          | 7.82 $\pm$ 5.42  |
| <b>MCB-T</b>  | 14.34 $\pm$ 0.92 | -0.69 $\pm$ 0.29 | 24.67 $\pm$ 15.72   | 2.19 $\pm$ 2.53         | -1.47 $\pm$ 2.02         | 2.17 $\pm$ 4.08  |
| <b>MCB-C</b>  | 15.56 $\pm$ 1.05 | 0.06 $\pm$ 0.24  | 60.93 $\pm$ 36.72   | 1.03 $\pm$ 0.6          | -1.01 $\pm$ 0.49         | 0                |
| <b>MCB-OS</b> | 14.84 $\pm$ 0.32 | 0.1 $\pm$ 0.18   | 388.11 $\pm$ 191.25 | 0.77 $\pm$ 0.15         | -0.82 $\pm$ 0.16         | 0                |
| <b>SCB-C</b>  | 18.68 $\pm$ 1.04 | 0.12 $\pm$ 0.12  | 42.86 $\pm$ 52.35   | 1.66 $\pm$ 1.83         | -0.08 $\pm$ 1.05         | 0                |
| <b>SCB-OS</b> | 18.09 $\pm$ 0.82 | 0.1 $\pm$ 0.12   | 542.13 $\pm$ 207.8  | 0.82 $\pm$ 0.11         | -0.7 $\pm$ 0.19          | 0                |

Absolute values of Depth (m) have been shown rather than its logarithm

Table S5. Monthly mean climatologies and descriptive statistics on annual mean climatologies of Chl-a concentration (2003-2010) ( $\text{mg}/\text{m}^3$ ) in ecoregions. Due to a non-normal distribution of Chl-a in marine environments median of monthly mean climatologies in each ecoregion is shown instead of mean (Nezlin, 2005).

|               | Ecoregion |        |        |        |       |       |       |        |       |        |
|---------------|-----------|--------|--------|--------|-------|-------|-------|--------|-------|--------|
|               | NCB-RO    | NCB-WS | NCB-UF | NCB-ES | NCB-T | MCB-T | MCB-C | MCB-OS | SCB-C | SCB-OS |
| <b>month</b>  |           |        |        |        |       |       |       |        |       |        |
| <b>1</b>      | 4.9       | 4.18   | 1.33   | 2.05   | 1.78  | 1.1   | 1.15  | 0.94   | 1.29  | 1.23   |
| <b>2</b>      | 5.46      | 6.1    | 1.56   | 2.23   | 2.1   | 1.14  | 1.15  | 0.91   | 0.98  | 0.96   |
| <b>3</b>      | 5.3       | 5.3    | 1.1    | 1.38   | 1.6   | 1.03  | 1.1   | 1.19   | 0.77  | 0.98   |
| <b>4</b>      | 4.5       | 4.93   | 0.83   | 1.12   | 1.34  | 0.74  | 0.8   | 0.98   | 0.71  | 0.96   |
| <b>5</b>      | 5.75      | 6.67   | 1.14   | 1.47   | 1.94  | 0.65  | 0.69  | 0.77   | 0.55  | 0.96   |
| <b>6</b>      | 5.84      | 5.92   | 1.72   | 1.91   | 2.81  | 1.03  | 0.61  | 0.76   | 0.48  | 0.89   |
| <b>7</b>      | 7.7       | 6.74   | 2.33   | 2.17   | 3.61  | 1.24  | 0.83  | 0.92   | 1.45  | 1.31   |
| <b>8</b>      | 7.1       | 6.16   | 2.18   | 2.43   | 3.31  | 1.33  | 1.17  | 1.1    | 1.82  | 1.66   |
| <b>9</b>      | 6.5       | 5.63   | 2.06   | 2.41   | 3.41  | 1.59  | 1.36  | 1.5    | 1.38  | 1.57   |
| <b>10</b>     | 6.38      | 6.13   | 1.88   | 1.88   | 2.66  | 2.01  | 1.77  | 1.78   | 1.56  | 1.82   |
| <b>11</b>     | 6.96      | 6.68   | 2.16   | 1.98   | 2.19  | 1.84  | 1.68  | 1.52   | 1.71  | 1.77   |
| <b>12</b>     | 4.19      | 4.42   | 1.9    | 2.09   | 1.78  | 1.59  | 1.77  | 1.45   | 1.61  | 1.45   |
| <b>annual</b> |           |        |        |        |       |       |       |        |       |        |
| <b>median</b> | 5.86      | 5.9    | 1.74   | 1.9    | 2.2   | 1.13  | 1.09  | 1.07   | 1.24  | 1.21   |
| <b>mean</b>   | 5.79      | 5.14   | 1.77   | 2.72   | 3.04  | 2.01  | 1.28  | 1.16   | 1.27  | 1.34   |
| <b>std</b>    | 0.98      | 1.66   | 0.3    | 1.02   | 1.66  | 1.46  | 0.32  | 0.11   | 0.34  | 0.14   |

Lower std in open ocean and higher std in NCB except for the Ural Furrow in NCB-UF.

Table S6. Presence information on the 25 marine species in ecoregions. '1' represents presence '-' represents lack of observation of species in the given ecoregion. Points located near/on the boundaries of ecoregions were also assigned '-' (Source: CEP, 2002 in [www.caspianenvironment.org](http://www.caspianenvironment.org)).

| Species                           | Ecological taxonomic group | Ecoregion |         |         |         |        |        |        |         |        |         |
|-----------------------------------|----------------------------|-----------|---------|---------|---------|--------|--------|--------|---------|--------|---------|
|                                   |                            | NCB -RO   | NCB -WS | NCB -UF | NCB -ES | NCB -T | MCB -T | MCB -C | MCB -OS | SCB -C | SCB -OS |
| <i>Eurytemora grimaldi</i>        | Zooplankton                | -         | -       | -       | -       | 1      | 1      | 1      | 1       | 1      | 1       |
| <i>Mnemiopsis leidyi</i>          |                            | -         | -       | -       | -       | 1      | 1      | 1      | 1       | 1      | 1       |
| <i>Stenodus leusichthys</i>       | Pelagic fish               | -         | 1       | 1       | 1       | 1      | 1      | 1      | -       | -      | 1       |
| <i>Liza aurata</i>                |                            | -         | 1       | 1       | 1       | 1      | 1      | 1      | 1       | 1      | 1       |
| <i>Liza saliens</i>               |                            | -         | 1       | 1       | 1       | 1      | 1      | 1      | 1       | 1      | 1       |
| <i>Salmo trutta caspius</i>       |                            | -         | -       | -       | -       | 1      | 1      | 1      | 1       | -      | 1       |
| <i>Alosa kessleri kessleri</i>    |                            | -         | 1       | -       | -       | 1      | 1      | 1      | 1       | 1      | 1       |
| <i>Alosa saposchnikowii</i>       |                            | -         | 1       | 1       | -       | 1      | 1      | 1      | 1       | 1      | 1       |
| <i>Atherina boyeri caspia</i>     |                            | -         | 1       | 1       | 1       | 1      | 1      | 1      | 1       | 1      | 1       |
| <i>Clupeonella cultriventris</i>  |                            | 1         | 1       | 1       | -       | 1      | 1      | 1      | -       | 1      | -       |
| <i>Clupeonella engrauliformis</i> |                            | -         | -       | -       | -       | 1      | 1      | 1      | 1       | -      | 1       |
| <i>Rutilus rutilus</i>            | Demersal fish              | 1         | 1       | 1       | -       | 1      | 1      | 1      | -       | 1      | 1       |
| <i>Rutilus frisii kutum</i>       |                            | -         | 1       | -       | -       | 1      | 1      | 1      | -       | 1      | 1       |
| <i>Cyprinus carpio</i>            |                            | 1         | 1       | 1       | 1       | 1      | 1      | 1      | -       | 1      | -       |
| <i>Abramis brama</i>              |                            | -         | 1       | 1       | -       | 1      | 1      | 1      | -       | -      | -       |
| <i>Acipenser gueldenstaedtii</i>  |                            | -         | 1       | 1       | -       | 1      | 1      | 1      | 1       | 1      | 1       |
| <i>Acipenser persicus</i>         |                            | -         | 1       | 1       | -       | 1      | -      | 1      | 1       | 1      | 1       |
| <i>Huso huso</i>                  |                            | -         | 1       | 1       | 1       | 1      | 1      | 1      | 1       | 1      | 1       |
| <i>Neogobius melanostomus</i>     |                            | -         | 1       | 1       | -       | 1      | 1      | 1      | 1       | 1      | 1       |
| <i>Benthophilus stellatus</i>     |                            | 1         | 1       | 1       | 1       | 1      | 1      | 1      | 1       | 1      | 1       |
| <i>Acipenser stellatus</i>        |                            | -         | 1       | 1       | 1       | 1      | 1      | 1      | 1       | 1      | 1       |
| <i>Acipenser nudiiventris</i>     |                            | -         | -       | 1       | 1       | -      | 1      | 1      | 1       | 1      | 1       |
| <i>Caspiastacus pachypus</i>      | Invertebrata               | -         | -       | -       | -       | -      | 1      | 1      | -       | 1      | -       |
| <i>Abra (Syndesmya) ovata</i>     |                            | -         | 1       | 1       | -       | 1      | 1      | 1      | -       | 1      | -       |
| <i>Hypanis angusticostata</i>     |                            | 1         | 1       | 1       | 1       | 1      | 1      | 1      | -       | -      | -       |

### Supplementary Figure Captions

Fig. S1 Sum of normalized quantization and topological errors as a function of number of neurons

Fig. S2 The SOM component planes. Each plane indicates the distribution of individual input variable across the neuron map.

Fig. S3 Cross validation mean error against the number of classes. The error was determined using the mean absolute error (MAE) metric between each validation observation and its BMU.

Fig. S4 HAC dendrogram showing the hierarchy of the ecoregions. HAC successively agglomerates pairs of classes based on their similarity. The bottom-up clustering procedure starts with each neuron being considered as a single class. The iteration ends when all the neurons have been merged into a single class (Frades and Matthiessen, 2010). Dashed red line shows the levels of the hierarchy for classifications with 11 number of ecoregions.

Fig. S5 Non-metric multidimensional scaling (NMDS) ordination plot of the individual 0.1 degree pixels in the study area. Different colors of the points represent the correspondent ecoregion for that point. The distance between points reflects their underlying similarity/dissimilarity, i.e. their distance in 6-dimensional environmental variable space. Ecoregions in the NCB (red circle on the right) are distant from ecoregions in the MCB and SCB (green circle on the left).
